# Supplementary material for: DNA cleavage and antitumour activity of platinum(II) and copper(II) compounds derived from 4-methyl-2-N-(2-pyridylmethyl)aminophenol: spectroscopic, electrochemical and biological investigation
Source: Royal Society of Chemistry journal article supplement (doi:10.1039/b911542k), 2009-01-01
Supplement: b911542k.pdf [file b911542k.pdf]

## DNA cleavage and antitumor activity of platinum(II) and copper(II) compounds derived from 4-methyl-2-*N*-(2-pyridylmethyl)aminophenol: spectroscopic, electrochemical and biological investigation

Sudeshna Roy,<sup>†</sup> Palanisamy Uma Maheswari,<sup>†</sup> Martin Lutz,<sup>‡</sup> Anthony L. Spek,<sup>‡</sup> Hans den Dulk,<sup>†</sup> Sharief Barends,<sup>†</sup> Gilles P. van Wezel,<sup>†</sup> František Hartl<sup>#,&</sup> and Jan Reedijk<sup>\*,†</sup>

<sup>†</sup>*Leiden Institute of Chemistry, Gorlaeus Laboratories, Leiden University, P.O. Box 9502, 2300 RA Leiden, The Netherlands*

<sup>‡</sup>*Bijvoet Center for Biomolecular Research, Crystal and Structural Chemistry, Utrecht University, Padualaan 8, 3584 CH Utrecht, The Netherlands*

<sup>#</sup>*Van 't Hoff Institute for Molecular Sciences, University of Amsterdam, Nieuwe Achtergracht 166, 1018 WV Amsterdam, The Netherlands*

<sup>&</sup>*School of Chemistry, University of Reading, Whiteknights, Reading RG6 6AD, U.K.*

### List of contents:

**Table S1.** Selected bond lengths and bond angles for the compound PtL-Cl.

**Fig. S1.** Packing of PtL-Cl in the crystal. Hydrogen atoms are omitted for clarity. View along the crystallographic *c*-axis. Symmetry operations i: -*x*, 1-*y*, 1-*z*; ii: 1-*x*, 1-*y*, 1-*z*.

**Fig. S2.** Time-dependent accumulation of Pt (from PtL-Cl) in A2780 cell line.

**Fig. S3.** Time-dependent conformational changes of DNA induced by Hpyramol and cisplatin.

**Fig. S4.** UV-Vis spectral changes accompanying the oxidation of Hpyrimol ligand at the electrode potential O<sub>2</sub> to a phenoxyl radical species in DMF at room temperature, using an OTTLE cell.

**Fig. S5.** ESI-MS spectra of platinum moieties detected during the reaction in presence of PtL-Cl with 9-EtG in DMSO. The panel (a) shows selected part and panel (b) shows the full spectrum.

**Fig. S6.** ESI-MS spectra of platinum moieties detected during the reaction in presence of PtL-Cl with 5'-GMP in DMSO-H<sub>2</sub>O with (a) mainly solvated products and (b) some GMP-adducts after selected part zoomed out.

**Fig. S7.** <sup>1</sup>H NMR spectrum of PtL-Cl (in DMSO-*d*<sub>6</sub> + D<sub>2</sub>O) at 17 °C in the presence of d(GTCGAC)<sub>2</sub> in H<sub>2</sub>O, at the ratio 1:1 (PtL-Cl : oligonucleotide).

**Fig. S8.** 1-D, <sup>1</sup>H NMR spectra of (a) pure PtL-Cl in DMSO-*d*<sub>6</sub> + D<sub>2</sub>O (inset – numbering scheme of PtL-Cl); (b) PtL-Cl (in DMSO-*d*<sub>6</sub>) + oligonucleotide (in 90% H<sub>2</sub>O – 10%D<sub>2</sub>O) and (c) d(GTCGAC)<sub>2</sub> in 90% H<sub>2</sub>O – 10% D<sub>2</sub>O (inset – the numbering scheme of the self complimentary oligonucleotide).

**Fig. S9.** <sup>1</sup>H NMR, 2-D DQF-COSY for the pure compound PtL-Cl in DMSO-*d*<sub>6</sub> at 27 °C.

**Fig. S10.** <sup>1</sup>H NMR, 2-D DQF-COSY for the pure d(GTCGAC)<sub>2</sub> in 90% H<sub>2</sub>O and 10% D<sub>2</sub>O at 27 °C.

**Fig. S11.** <sup>1</sup>H NMR, 2-D COSY spectrum of PtL-Cl (in DMSO-*d*<sub>6</sub> + D<sub>2</sub>O) at 27 °C in the presence of d(GTCGAC)<sub>2</sub> in H<sub>2</sub>O at 1:1 ratio (PtL-Cl : oligonucleotide).

**Fig. S12.**  $^1\text{H}$  NMR, 2-D NOESY spectrum of PtL-Cl (in  $\text{DMSO-}d_6 + \text{D}_2\text{O}$ ) at  $27^\circ\text{C}$  in the presence of  $d(\text{GTCGAC})_2$  in  $\text{H}_2\text{O}$  at 1:1 ratio (PtL-Cl : oligonucleotide).

**Table S1.** Selected bond lengths [ $\text{\AA}$ ] and bond angles [ $^\circ$ ] for the compound PtL-Cl

| Bond lengths         |             |
|----------------------|-------------|
| Pt(1) – N(1)         | 2.009 (4)   |
| Pt(1) – N(2)         | 1.946 (4)   |
| Pt(1) – Cl(1)        | 2.3017 (12) |
| Pt(1) – O(1)         | 2.016 (3)   |
| Bond angles          |             |
| Cl(1) – Pt(1) – O(1) | 94.88 (9)   |
| Cl(1) – Pt(1) – N(1) | 99.14 (11)  |
| Cl(1) – Pt(1) – N(2) | 177.04 (10) |
| N(1) – Pt(1) – N(2)  | 81.74 (15)  |
| O(1) – Pt(1) – N(2)  | 84.23 (14)  |
| N(1) – Pt(1) – O(1)  | 165.97(14)  |

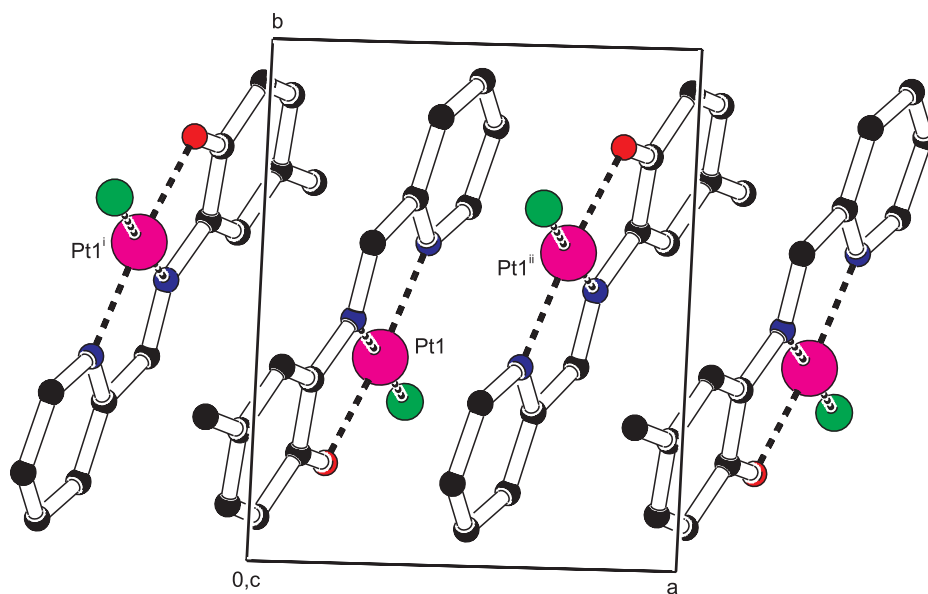

**Fig. S1.** Packing of PtL-Cl in the crystal. Hydrogen atoms are omitted for clarity. View along the crystallographic  $c$ -axis. Symmetry operations i:  $-x, 1-y, 1-z$ ; ii:  $1-x, 1-y, 1-z$ .

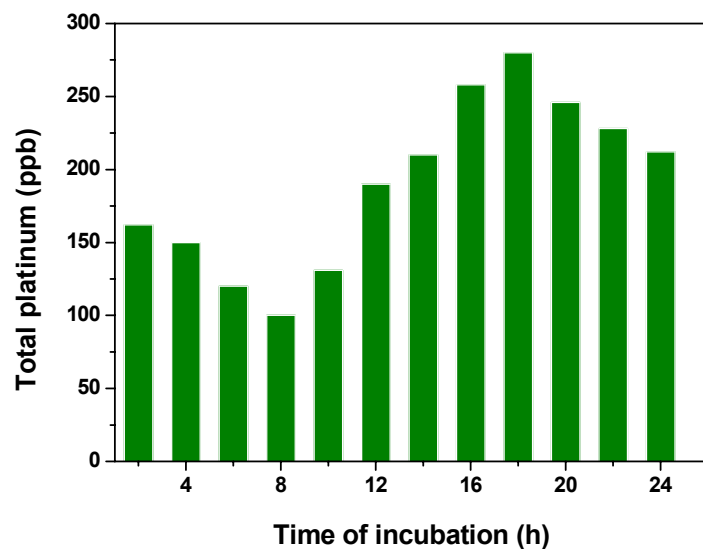

**Fig. S2.** Time-dependent accumulation of Pt (from PtL-Cl) in the A2780 cell line.

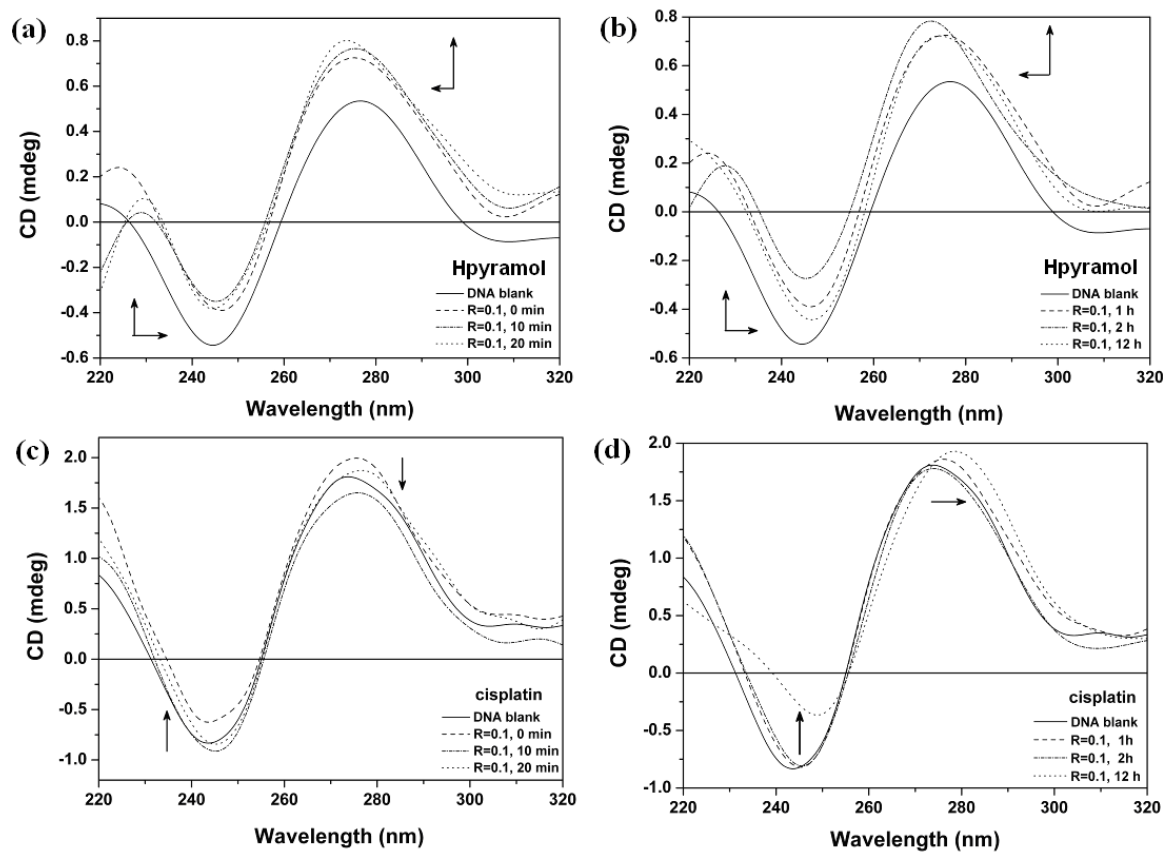

**Fig. S3.** Time-dependent conformational changes of right-handed DNA upon addition of Hpyramol and cisplatin in phosphate buffer (10 mM) at pH = 7.2 at 37 °C with R=0.1.

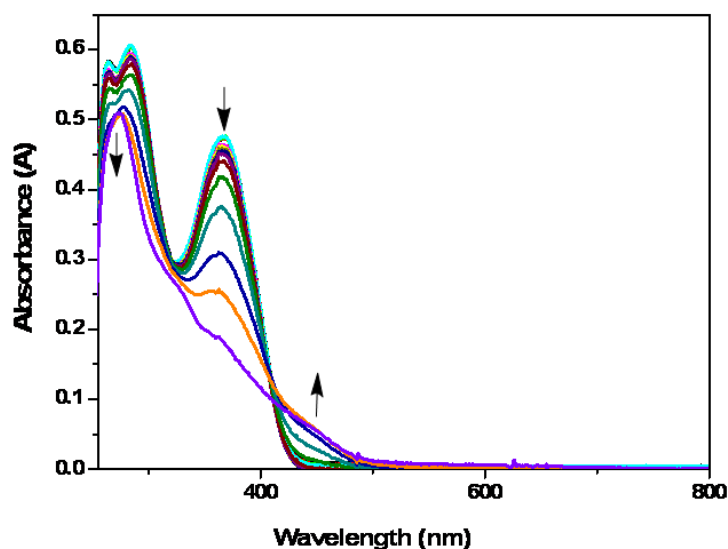

**Fig. S4.** UV-Vis spectral changes accompanying the oxidation of Hpyrimol ligand at the electrode potential O<sub>2</sub> (Fig. 8b) to an assumed phenoxyl radical species in DMF at room temperature, using an OTTLE cell.

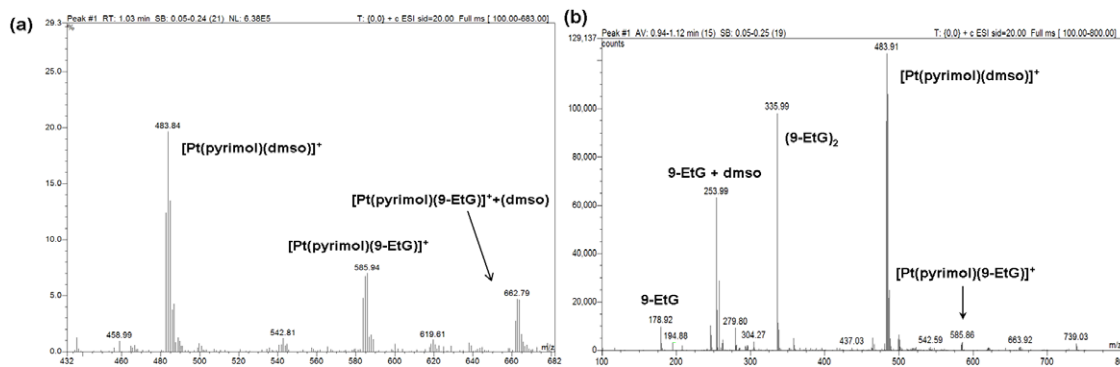

**Fig. S5.** ESI-MS spectra of platinum moieties detected during the reaction in presence of PtL-Cl with 9-EtG in DMSO. The panel (a) shows selected part and panel (b) shows the full spectrum.

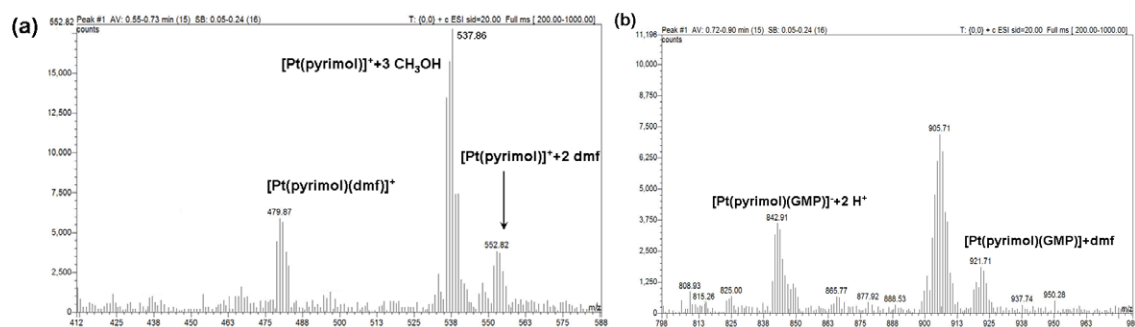

**Fig. S6.** ESI-MS spectra of platinum moieties detected during the reaction in presence of PtL-Cl with 5'-GMP in DMSO-H<sub>2</sub>O with (a) mainly solvated products and (b) some GMP-adducts after selected part zoomed out.

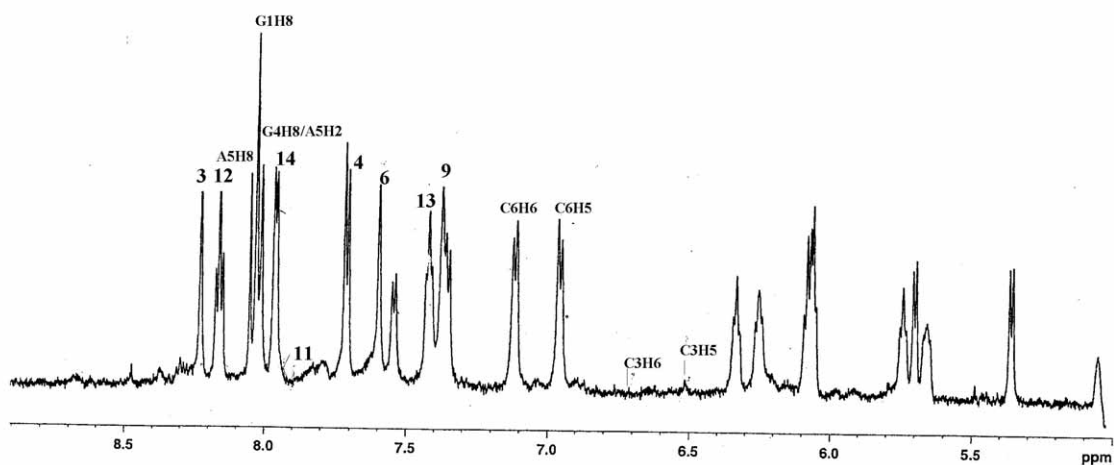

**Fig. S7.** <sup>1</sup>H NMR spectrum of PtL-Cl (in DMSO-*d*<sub>6</sub> + D<sub>2</sub>O) at 17 °C in the presence of d(GTCGAC)<sub>2</sub> in H<sub>2</sub>O, at the ratio 1:1 (PtL-Cl : oligonucleotide).

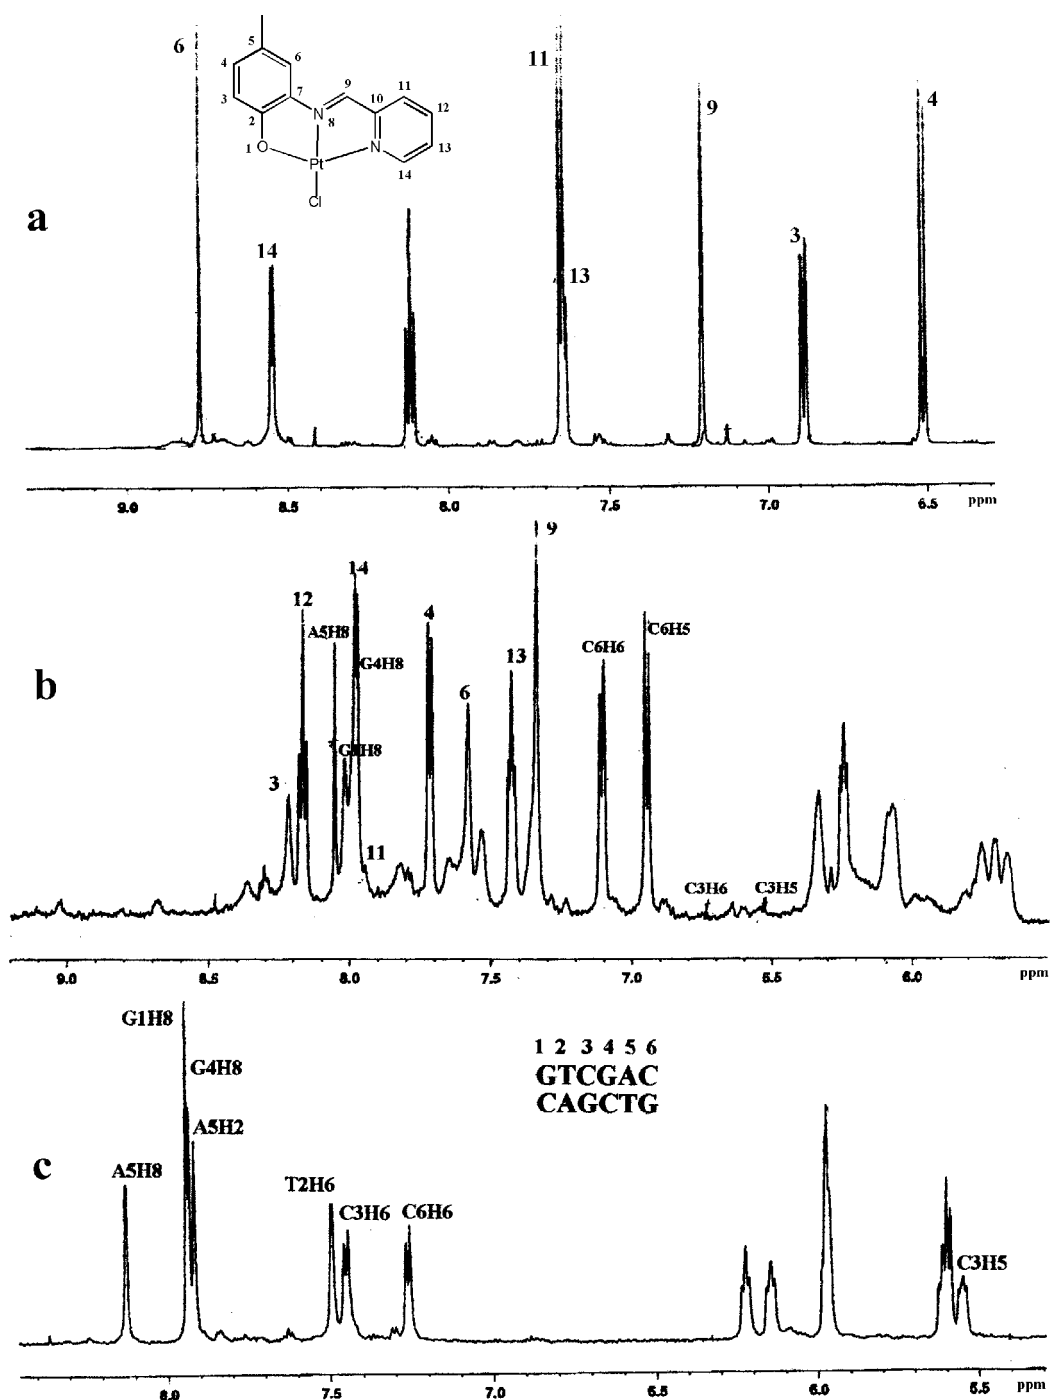

**Fig. S8.** 1-D, <sup>1</sup>H NMR spectra of (a) pure PtL-Cl in DMSO-*d*<sub>6</sub> + D<sub>2</sub>O (inset – numbering scheme of PtL-Cl); (b) PtL-Cl (in DMSO-*d*<sub>6</sub>) + oligonucleotide (in 90% H<sub>2</sub>O – 10% D<sub>2</sub>O) and (c) d(GTCGAC)<sub>2</sub> in 90% H<sub>2</sub>O – 10% D<sub>2</sub>O (inset – the numbering scheme of the self-complementary oligonucleotide).

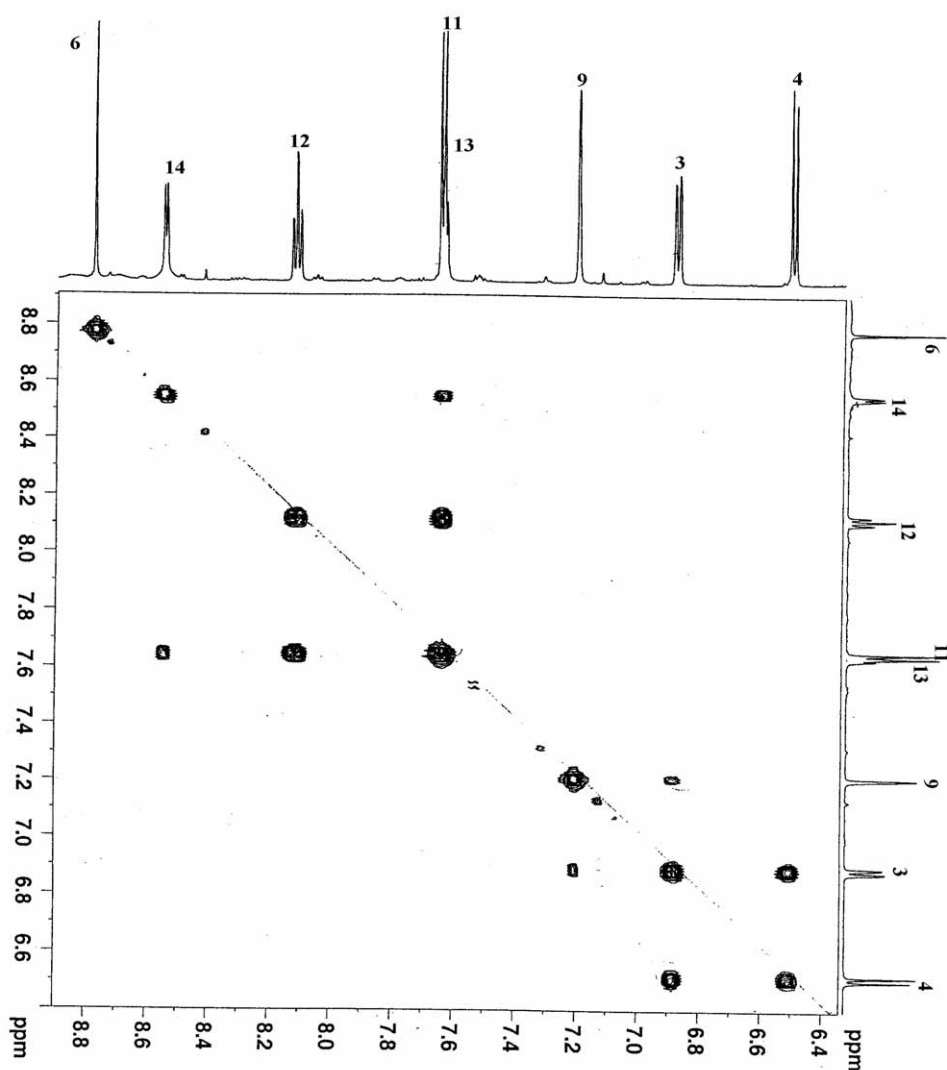

**Fig. S9.**  $^1\text{H}$  NMR, 2-D DQF-COSY for the pure compound PtL-Cl in  $\text{DMSO-}d_6$  at  $27^\circ\text{C}$ . The assignments were done according to through-bond interactions.

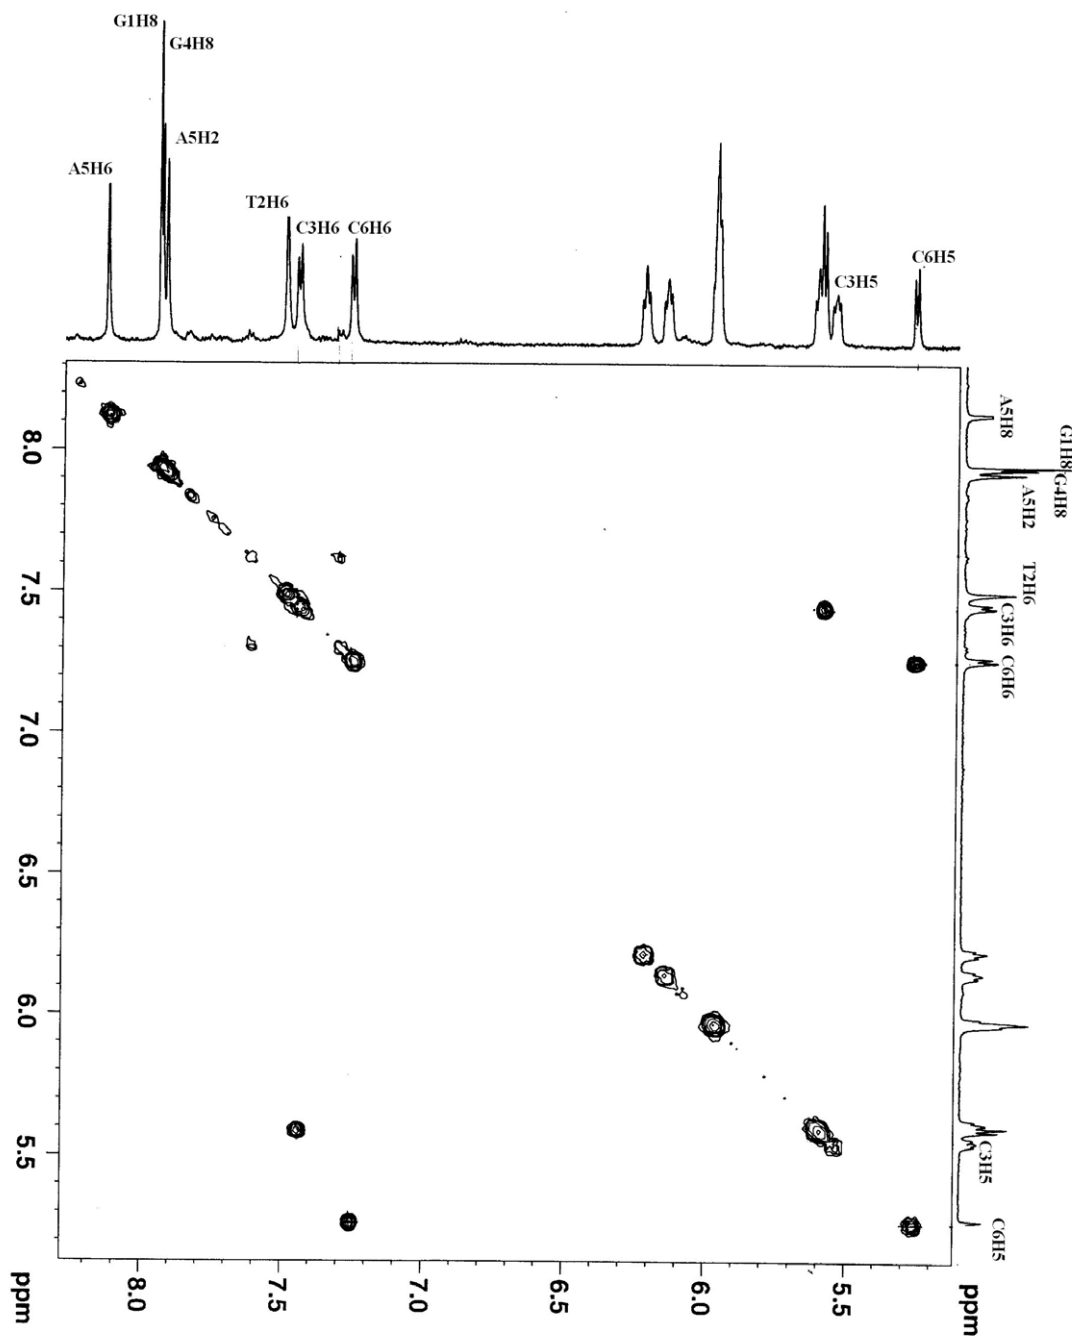

**Fig. S10.** <sup>1</sup>H NMR, 2-D DQF-COSY for the pure d(GTCGAC)<sub>2</sub> in 90% H<sub>2</sub>O and 10% D<sub>2</sub>O at 27 °C. The assignments were done according to through-bond interactions.



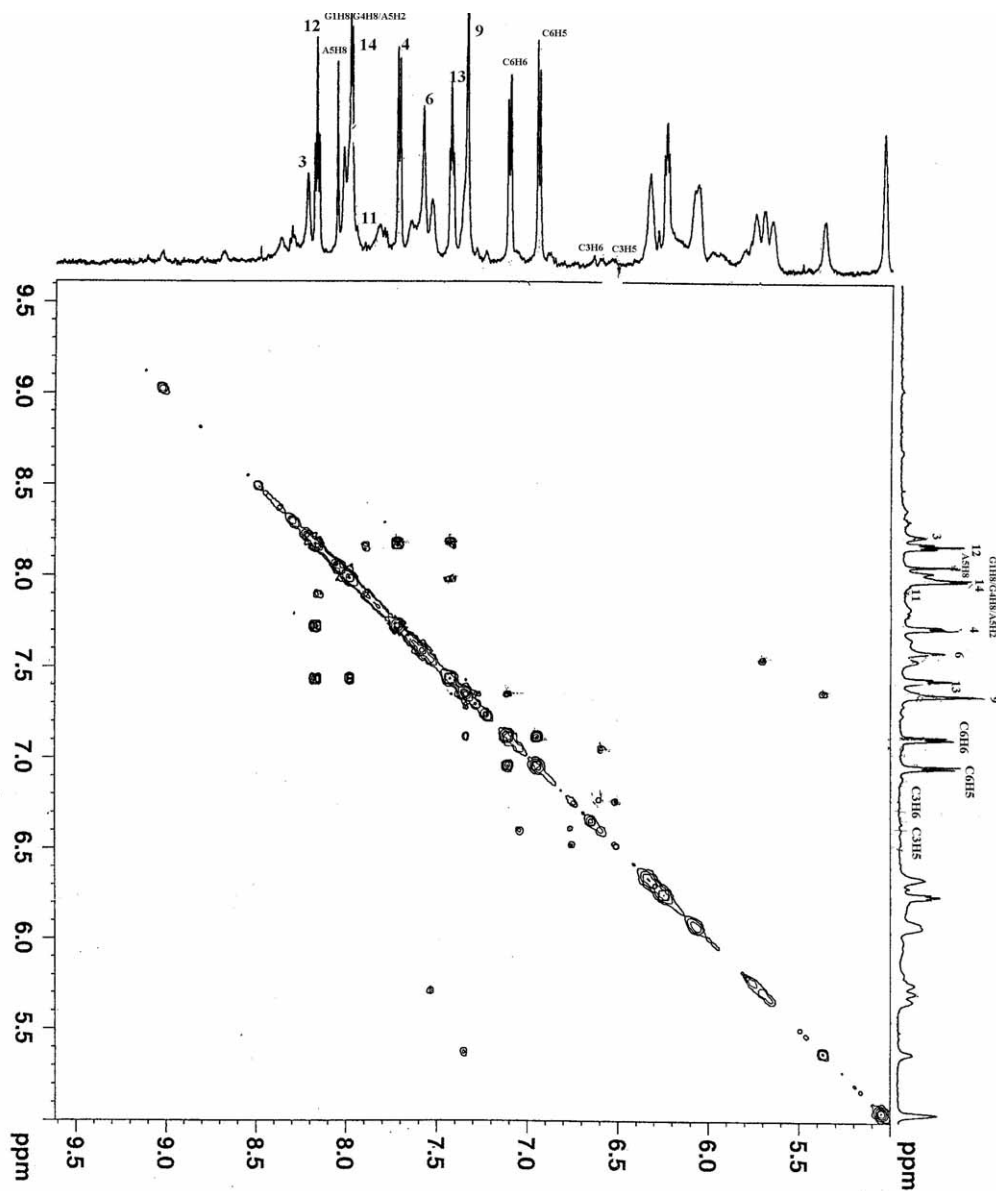

**Fig. S11.** <sup>1</sup>H NMR, 2-D COSY spectrum of PtL-Cl (in DMSO-*d*<sub>6</sub> + D<sub>2</sub>O) at 27 °C in the presence of d(GTCGAC)<sub>2</sub> in H<sub>2</sub>O at 1:1 ratio (PtL-Cl : oligonucleotide).

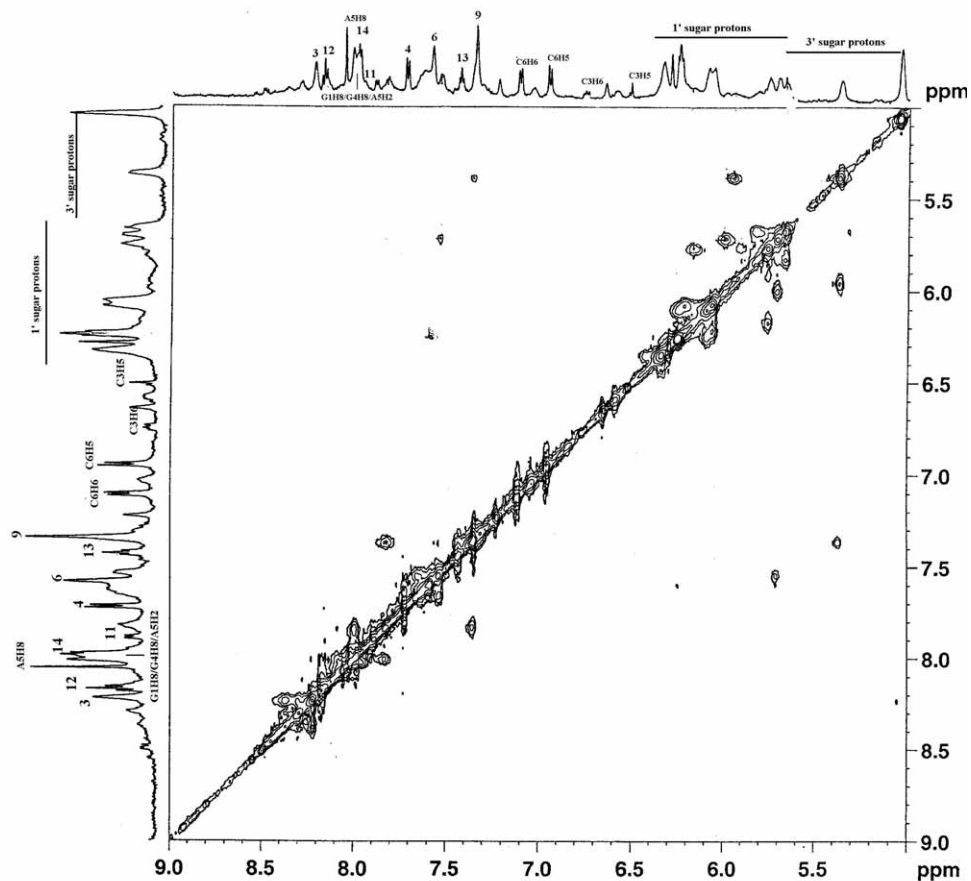

**Fig. S12.**  $^1\text{H}$  NMR, 2-D NOESY spectrum of PtL-Cl (in  $\text{DMSO-}d_6 + \text{D}_2\text{O}$ ) at 27 °C in the presence of  $d(\text{GTCGAC})_2$  in  $\text{H}_2\text{O}$  at 1:1 ratio (PtL-Cl : oligonucleotide).
